# Supplementary material
Source: Springer Nature journal article supplement (https://www.springermedizin.de/resource/supplementary/12872_2006_123_MOESM2_ESM.pdf/9431070)

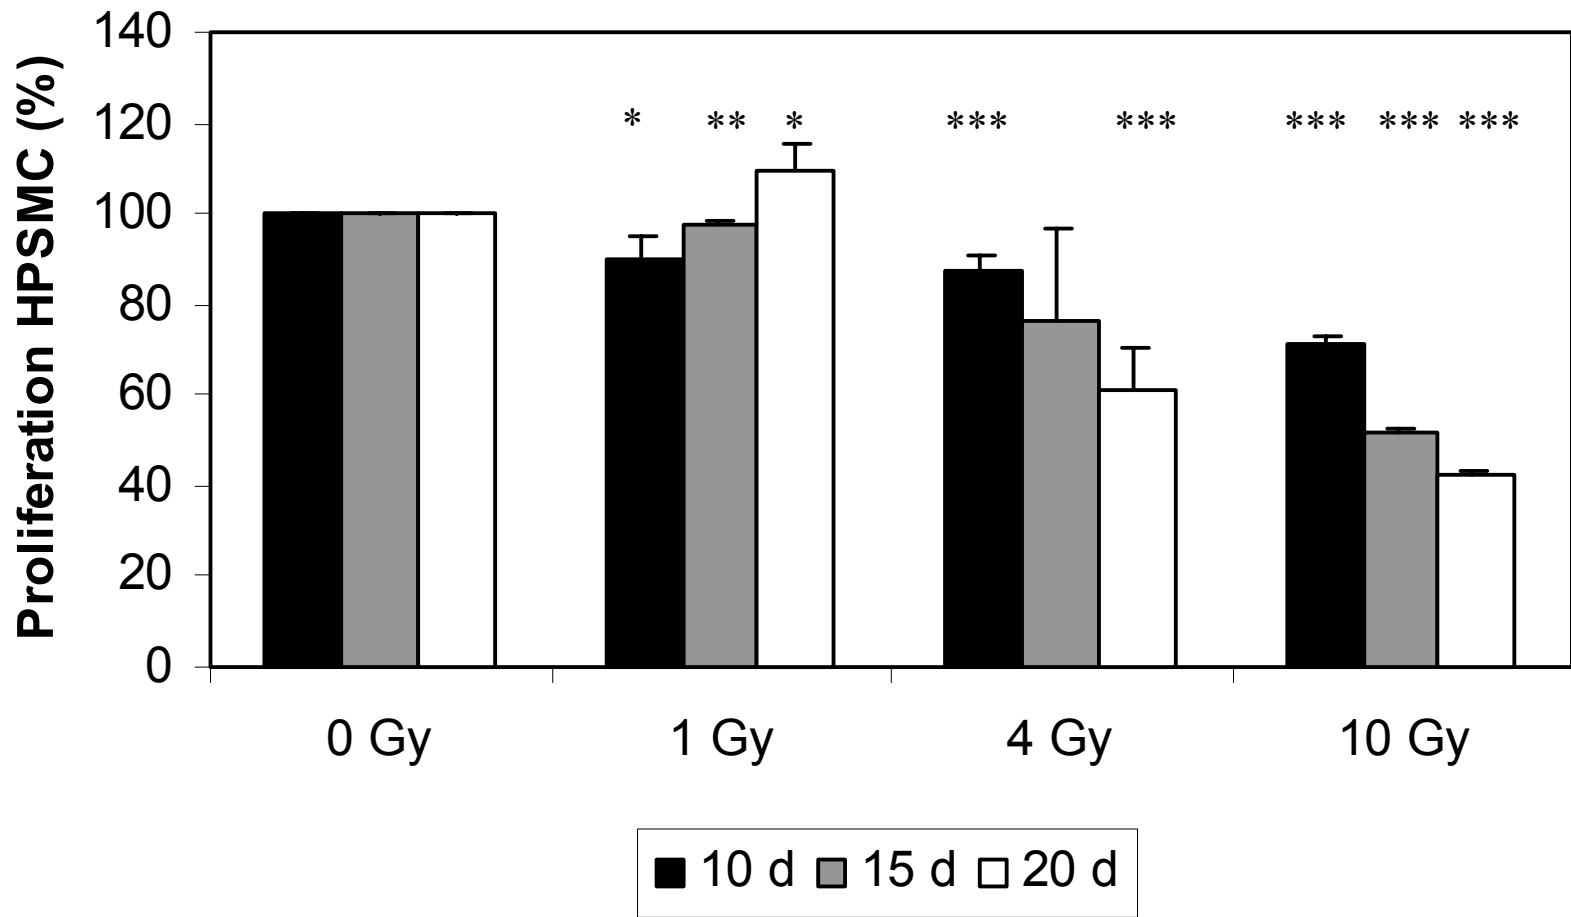

\* < 0,05; \*\* = 0,01; \*\*\* < 0,001

Supplement: MOESM2 [file 9431070]
